# Supplementary material for: Organic Electrochemical Transistor with MoS2 Nanosheets Modified Gate Electrode for Sensitive Glucose Sensing
Source: MDPI journal article supplement (doi:10.3390/s23177449), 2023-08-27
Supplement: s1 [file s1]

## Supplementary Materials

### Organic Electrochemical Transistor with MoS<sub>2</sub> Nanosheets Modified Gate Electrode for Sensitive Glucose Sensing

Jin Hu, Jiajia Dai, Caiping Huang, Xierong Zeng, Weiwei Wei, Zhezhe Wang, Peng Lin

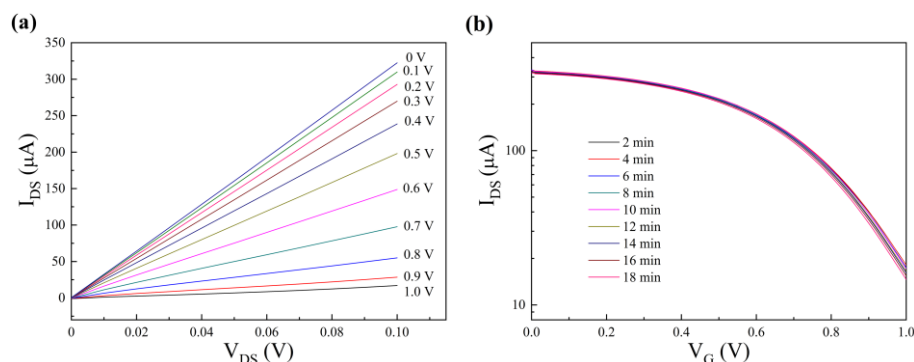

Figure S1. Characterization of OECT with a pure Pt gate electrode measured in PBS solution. (a) Output characteristic of the OECT. (b) Transfer characteristic of the OECT device at  $V_{DS} = 0.1$  V.

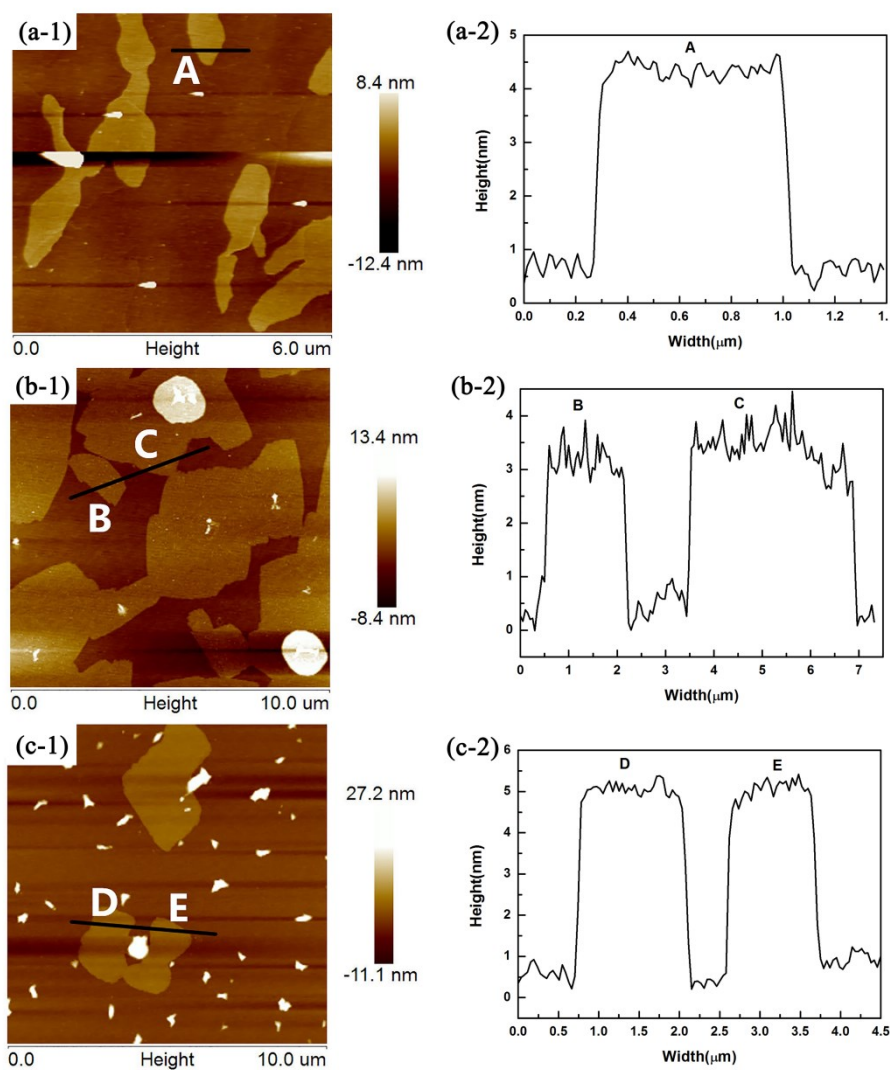

Figure S2. AFM images of MoS<sub>2</sub> nanosheets stripped with (a-1) NMP solvent, (b-1) sodium cholate solution, (c-1) aqueous alcohol. (a-2), (b-2), (c-2) are thickness of position A, B, C, D, E in AFM images of (a-1), (b-1), (c-1), respectively.
